## Increased oxygen uptake and utilization in the peripheral muscles, rather than cardiac function reserve, may be determinants of increased peak VO<sub>2</sub> by cardiac rehabilitation in heart failure

H. Hasegawa<sup>1</sup>, T. Kono<sup>2</sup>, K. Sakane<sup>1</sup>, T. Matsuoka<sup>2</sup>, A. Soyama<sup>2</sup>, S. Murakami<sup>2</sup>, M. Hoshiga<sup>1</sup>

<sup>1</sup>Osaka Medical College, Takatsuki, Japan; <sup>2</sup>Soseikai General Hospital, Cardiology, Kyoto, Japan

**Funding Acknowledgement:** Type of funding source: None

**Background:** Peak oxygen consumption (peak VO<sub>2</sub>) is a major prognostic parameter in heart failure (HF). Previous studies have shown a relationship between peak VO<sub>2</sub> and impaired oxygen uptake and utilization in the peripheral muscles. The purpose of this study was to clarify the determinant of increased peak VO<sub>2</sub> by cardiac rehabilitation (CR) in patients with HF.

**Methods:** We performed echocardiography during upright ramp bicycle cardiopulmonary exercise test in 30 HF patients (61±1 years of age, 80% male) before and 6 months after CR. HR reserve was determined as the change in HR from rest to peak exercise, expressed as a percentage of the predicted maximal HR reserve. Elastance index (EAI) and LV end-systolic elastance index (ELVI) were derived as the ratio of end-systolic pressure to stroke volume index and end-systolic volume index, respectively. End-systolic pressure was estimated from the equation  $0.9 \times$  brachial systolic

blood pressure. Ventriculo-arterial coupling (VAC) was calculated as the quotient of EAI and ELVI. The ratio of LDEDVI to E/e' mean was used to evaluate LV diastolic compliance. Systemic vascular resistance index was calculated as mean arterial pressure divided by echocardiography calculated cardiac index and multiplied by 80. The arterial venous oxygen content difference (C (A-V) O<sub>2</sub> gradient) was calculated by using the Fick equation as: VO<sub>2</sub>/echocardiography calculated cardiac output.

**Results:** Peak VO<sub>2</sub> and C (A-V) O<sub>2</sub> gradient were increased by CR. However, heart rate reserve, systolic reserve, VAC, diastolic reserve and vasodilation reserve were unchanged by CR (Table 1).

**Conclusions:** Increased oxygen uptake and utilization in the peripheral muscles, rather than cardiac function reserve, may be determinants of increased peak VO<sub>2</sub> by CR in HF.

|                                                | pre         | post        | p     |
|------------------------------------------------|-------------|-------------|-------|
| peak VO <sub>2</sub> (ml/kg/min)               | 16.0±0.3    | 17.6±0.3    | 0.004 |
| peak VO <sub>2</sub> /HR (ml/kg)               | 8.6±0.3     | 9.8±0.3     | 0.004 |
| peak watt (watt)                               | 102.6±1.8   | 110.5±1.8   | 0.005 |
| rest HR (/min)                                 | 77.1±2.2    | 73.3±2.2    | 0.230 |
| peak HR (/min)                                 | 122.1±3.1   | 120.7±3.1   | 0.721 |
| ΔHR (%)                                        | 60.9±4.1    | 65.3±4.1    | 0.461 |
| Heart Rate Reserve (%)                         | 58.2±3.8    | 57.4±3.6    | 0.873 |
| rest LVEDVI (ml/mm <sup>2</sup> )              | 47.4±1.8    | 45.1±1.6    | 0.360 |
| peak LVEDVI (ml/mm <sup>2</sup> )              | 51.5±2.6    | 44.3±2.8    | 0.073 |
| Δ LVEDVI (%)                                   | 10.0±5.8    | 8.1±5.8     | 0.818 |
| rest LVESVI (ml/mm <sup>2</sup> )              | 25.1±1.4    | 21.9±1.3    | 0.107 |
| peak LVESVI (ml/mm <sup>2</sup> )              | 23.8±2.1    | 18.4±2.3    | 0.100 |
| Δ LVESVI (%)                                   | -12.1±5.2   | -4.0±5.0    | 0.277 |
| rest LVEF (%)                                  | 49.5±1.7    | 55.3±1.6    | 0.020 |
| peak LVEF (%)                                  | 57.5±1.7    | 60.2±1.8    | 0.307 |
| ΔLVEF (%)                                      | 22.1±4.8    | 11.8±4.7    | 0.144 |
| rest Stroke Volume Index (ml/mm <sup>2</sup> ) | 22.2±1.0    | 23.2±0.9    | 0.474 |
| peak Stroke Volume Index (ml/mm <sup>2</sup> ) | 27.8±1.4    | 26.2±1.5    | 0.464 |
| ΔSVI (%)                                       | 36.1±8.3    | 19.5±8.3    | 0.175 |
| rest C (A-V)O <sub>2</sub> (mg/dl)             | 0.002±0.003 | 0.006±0.003 | 0.361 |
| peak C (A-V)O <sub>2</sub> (mg/dl)             | 0.006±0.001 | 0.009±0.002 | 0.039 |
| Δ C(A-V)O <sub>2</sub>                         | 159.3±34.9  | 286.6±34.9  | 0.018 |
| rest e' (cm/sec)                               | 6.4±0.3     | 7.1±0.3     | 0.100 |
| peak e' (cm/sec)                               | 8.0±0.5     | 9.2±0.5     | 0.092 |
| Δe' (%)                                        | 29.4±5.6    | 33.6±4.7    | 0.572 |
| rest E/e'                                      | 15.7±3.0    | 10.4±2.6    | 0.201 |
| peak E/e'                                      | 11.8±0.6    | 11.0±0.5    | 0.375 |
| ΔE/e' (%)                                      | -0.6±6.5    | 7.7±5.5     | 0.345 |
| rest EAI (mmHg/ml/mm <sup>2</sup> )            | 5.4±0.5     | 5.1±0.4     | 0.588 |
| peak EAI (mmHg/ml/mm <sup>2</sup> )            | 5.4±1.0     | 6.9±1.0     | 0.316 |
| ΔEAI (%)                                       | 0.04±0.1    | 0.15±0.1    | 0.436 |
| rest ELVI (mmHg/ml/mm <sup>2</sup> )           | 6.7±0.5     | 6.9±0.4     | 0.772 |
| peak ELVI (mmHg/ml/mm <sup>2</sup> )           | 9.5±0.6     | 9.5±0.6     | 0.983 |
| ΔELVI (%)                                      | 50.5±13.8   | 54.1±11.9   | 0.850 |
| rest VAC                                       | 1.06±0.21   | 1.02±0.18   | 0.869 |
| peak VAC                                       | 0.87±0.19   | 0.82±0.19   | 0.833 |
| ΔVAC (%)                                       | -32.9±5.9   | -20.6±5.4   | 0.157 |
| rest LVEDV/E/e' mean (ml)                      | 4.25±0.23   | 4.49±0.18   | 0.424 |
| peak LVEDV/E/e' mean (ml)                      | 4.45±1.35   | 5.60±1.26   | 0.433 |
| ΔLVEDV/E/e' mean (%)                           | 1.15±28.6   | 32.4±22.7   | 0.409 |
| rest SVRI (dyne/sec/cm <sup>5</sup> )          | 5.48±0.31   | 5.40±0.27   | 0.857 |
| rest SVRI (dyne/sec/cm <sup>5</sup> )          | 3.16±0.67   | 4.83±0.65   | 0.098 |
| ΔSVRI (%)                                      | -39.3±11.2  | -13.1±9.7   | 0.102 |

Table 1
